# Supplementary material
Source: Springer Nature journal article supplement (https://www.springermedizin.de/resource/supplementary/13058_2007_1946_MOESM2_ESM.pdf/9700280)
Supplement: MOESM2 [file 9700280]

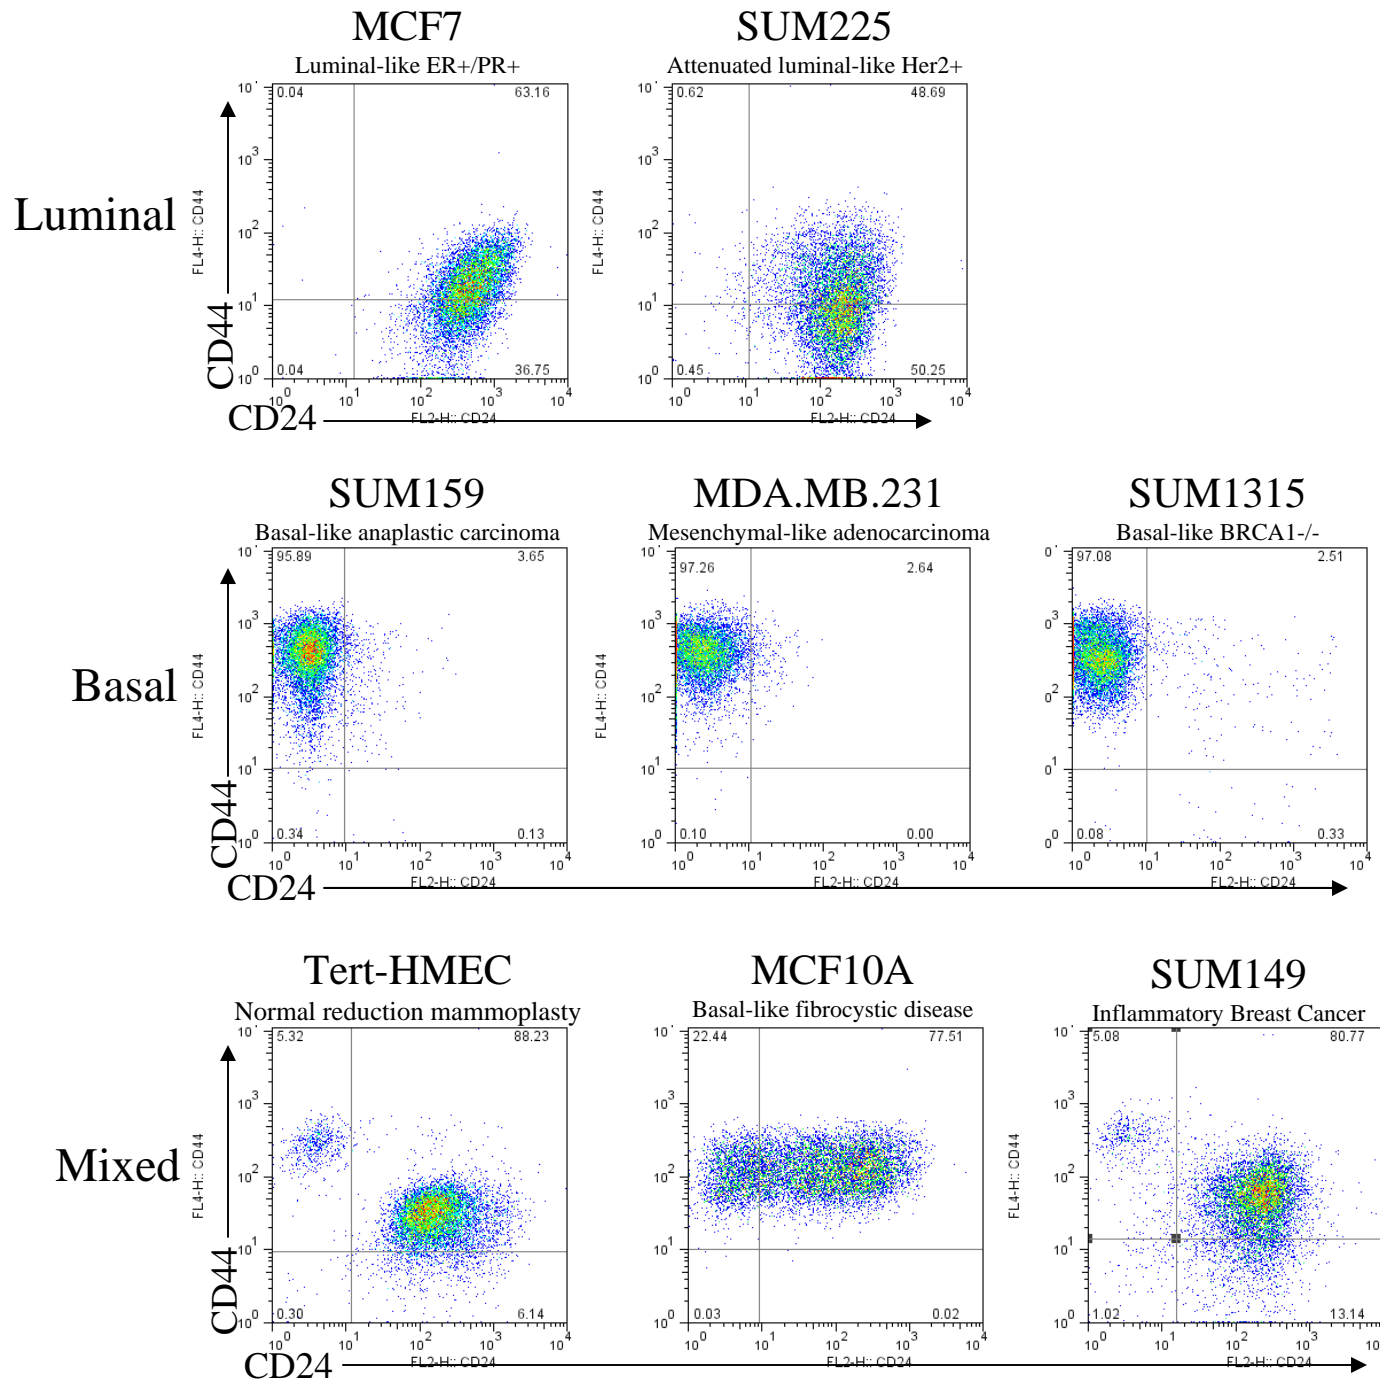

Fillmore et al. Supplemental Figure 1
